## 30 Introduction

31 The prevalence of overweight and obesity rises dramatically with age and is associated with increased  
32 morbidity and reduced quality of life (Kalyani et al., 2017). Hyperinsulinemia and insulin resistance are  
33 potential causes and consequences of obesity. Both are negatively affected by age and both play a  
34 pivotal role for the development of type 2 diabetes and other age-related diseases (Palmer and  
35 Kirkland, 2016). The mechanisms and directions of these interactions are under debate. For instance,  
36 it has long been assumed that insulin resistance in aging precedes the development of  
37 hyperinsulinemia, while recent data suggest a reverse direction (Janssen, 2021). Moreover, there is  
38 evidence from animal and human research of an weight-independent effect of aging on insulin  
39 sensitivity (Ehrhardt et al., 2019; Petersen et al., 2003).

40 Besides the importance of peripheral insulin for the glycemic control in the body, recent findings also  
41 highlight the role of insulin action in the brain for the metabolic and hedonic control of food intake  
42 (Kullmann et al., 2020a). Findings in rodents and humans indicate that, apart from signaling in  
43 hypothalamic neurocircuits regulating energy homeostasis, central insulin mediates non-homeostatic  
44 feeding for pleasure by signaling within mesolimbic reward circuits (Davis et al., 2010; Murray et al.,  
45 2014; Tiedemann et al., 2017). Specifically, insulin action in the ventral tegmental area (VTA) reduces  
46 hedonic feeding in rodents (Labouèbe et al., 2013; Mebel et al., 2012) and decreases hedonic value  
47 signals in the VTA and Nucleus accumbens (NAc) in lean subjects (Tiedemann et al., 2017). On the other  
48 hand, insulin-mediated long-term depression (LTD) of VTA dopamine neurons is reduced in  
49 hyperinsulinemia (Liu et al., 2013) and aberrant insulin action in VTA-NAc pathways has been observed  
50 in insulin resistant participants (Tiedemann et al., 2017).

51 There is consensus that improvement of hyperinsulinemia and insulin resistance, as achieved by caloric  
52 restriction, is key in the prevention and treatment of obesity, type 2 diabetes or cardiovascular  
53 diseases in aging (Janssen, 2021; Ryan, 2000). Evidence from human studies for such effects, however,  
54 are sparse, especially when it comes to central nervous insulin signaling. High insulin sensitivity in MEG  
55 theta activity was predictive for long-term weight management in 15 young adults (Kullmann et al.,  
56 2020b) suggesting the critical role of central insulin action for future feeding regulation and as a major  
57 target of treatment intervention. Whether such intervention can modulate brain insulin sensitivity in  
58 older age is particularly questionable given that changes in function and distribution of adipose tissue  
59 can trigger metabolic alterations such as hyperinsulinemia (Palmer and Kirkland, 2016; Tchkonja et al.,  
60 2010) and relevant brain circuits for central insulin action like the dopaminergic mesolimbic pathway  
61 undergo age-related changes (Karrer et al., 2017).

62 In the current longitudinal study, we investigated the role of peripheral and central insulin resistance  
63 regarding their predictive value for dietary success in older adults and whether both can be modified  
64 by weight changes. Fifty older (> 55 years) overweight, non-diabetic individuals were randomly  
65 assigned to a three-months, caloric restriction intervention or an active waiting group. Before and after  
66 the intervention, overnight fasted participants took part in a cross-over, placebo-controlled, double-  
67 blind pharmacological fMRI examination in which they rated the palatability of high and low sugar food  
68 pictures and the attractiveness of non-food items (control) after receiving intranasal insulin (INI) or  
69 placebo. Fasting c-peptides and blood glucose were assessed to calculate peripheral insulin sensitivity.  
70 We tested several predictions: (i) successful weight loss can be predicted by peripheral and central  
71 insulin sensitivity, the latter indicated by an insulinergic inhibition of mesolimbic responses to hedonic  
72 food stimuli at baseline (Tiedemann et al., 2017), and (ii) both, peripheral and central insulin sensitivity  
73 improve with successful weight loss at follow-up. Moreover, we explored the common and distinct  
74 impact of both markers on weight (changes) in older age.

## 75 Results

76 Fifty overweight and obese older adults (age:  $63.7 \pm 5.9$  years; BMI:  $32.7 \pm 4.3$  kg/m<sup>2</sup>; 20 males) with  
 77 an explicit wish to lose weight participated in this study. Of these, thirty randomly selected participants  
 78 underwent a three months caloric restriction diet (diet group, DG), while twenty participants were  
 79 randomly assigned to a 3-months active waiting group (WG). Before (T0) and after (T1) the intervention  
 80 phase, we assessed anthropometrics and blood measures. Normal HbA1C values confirm the exclusion  
 81 of manifest diabetes in overweight and obese participants who are at risk for T2D but in whom  
 82 elevated insulin release may still compensate for reduced insulin sensitivity (mean HOMA-IR:  $3.02 \pm$   
 83  $1.0$ ). All participants underwent a double-blind, randomized, placebo-controlled fMRI paradigm on  
 84 food and non-food liking combined with an intranasal insulin application (INI) before and after the  
 85 intervention phase (Figure 1). Thus, each participant attended a total of four scanning sessions. This  
 86 longitudinal, within-subject design allowed us to evaluate peripheral and food-related central insulin  
 87 action linked to overweight and weight loss in older adults.

88

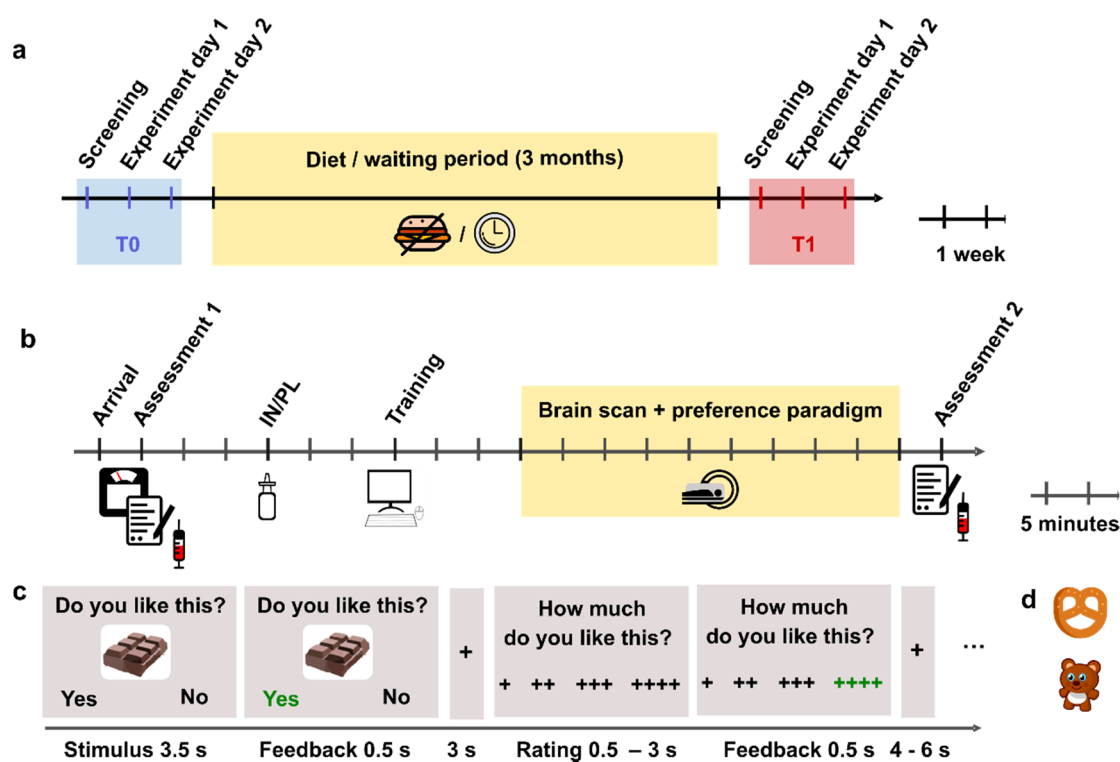

89

90 **Figure 1. Outline of the study design and experimental task.** (a) Timeline of the longitudinal design.  
 91 Each participant attended four fMRI sessions, two each before and after the three-month intervention  
 92 interval. (b) Protocol of the experimental MRI sessions. (c) Timing of the fMRI paradigm. Example of a  
 93 high sugar food trial. d) Examples of low-sweet food and non-food items.

94

95

### 96 Caloric restriction significantly reduces weight in dieters

97 Glucose, insulin and c-peptide levels were assessed on all four study days in the morning after an  
 98 overnight fast of at least 10 h. Fasting glucose levels confirmed fasting state in all participants. Groups  
 99 were well balanced regarding gender, age, overnight fasting times and days between sessions (all  $P >$   
 100  $.28$ ). At T0, BMI, weight, bodyfat, waist and HOMA-IR did not differ between groups (all  $P >$   $.09$ , Table  
 101 1).

102 **Table 1. Sample characteristics at baseline and follow-up**

|                          | DG ( N = 30 ) |             |        | WG ( N = 20 ) |            |        |                |
|--------------------------|---------------|-------------|--------|---------------|------------|--------|----------------|
|                          | T0            | T1          | P time | T0            | T1         | P time | P time x group |
| BMI (kg/m <sup>2</sup> ) | 32.1 (0.7)    | 30.8 (0.6 ) | ***    | 32.8 (1.1)    | 32.8 (1.2) | N.S.   | ***            |
| Waist (cm)               | 103.7 (1.8)   | 98.1 (1.9)  | ***    | 103.1 (2.7)   | 99.7 (2.8) | N.S.   | N.S.           |
| Bodyfat                  | 37.4 (1.3)    | 36.7 (1.4)  | N.S.   | 39.5 (1.6)    | 39.0 (1.7) | N.S.   | N.S.           |
| Blood                    |               |             |        |               |            |        |                |
| HOMA-IR                  | 2.8 (0.2)     | 2.5 (0.2)   | +      | 3.3 (0.3)     | 3.7 (0.3)  | N.S.   | **             |
| CPR-IR                   | 4.3 (0.2)     | 4.8 (0.4)   | **     | 3.7 (0.3)     | 3.8 (0.3)  | N.S.   | +              |
| Glucose (mmol/L)         | 5.5 ( 0.1 )   | 5.4 (0.1)   | N.S.   | 5.7 (0.1)     | 5.8 (0.1)  | N.S.   | N.S.           |
| Insulin (pmol/L)         | 78.8 (4.0)    | 70.3 (4.4)  | +      | 95.5 (8.7)    | 94.2 (7.7) | N.S.   | N.S.           |
| C-peptide (nmol/L)       | 0.9 ( 0.03 )  | 0.8 (0.04)  | *      | 1.1 (0.06)    | 1.0 (0.05) | N.S.   | N.S.           |
| HbA1C                    | 5.4 ( 0.03 )  | 5.4 (0.04)  | N.S.   | 5.5 (.07)     | 5.5 (.07)  | N.S.   | N.S.           |

103 BMI, body mass index; HOMA-IR, Homeostatic Model Assessment for Insulin Resistance, CPR-IR C-  
 104 peptide based index of insulin sensitivity; NS, not significant. \*\*\*P < .001, \*\*P < .01, \*P < .05, +P < .10,  
 105 s.e.m. in parentheses, DG: diet group, WG: waiting group, PL= placebo, IN = insulin, T0 = baseline, T1  
 106 = follow-up.

107

108 After three months (mean 96 ± 10 days, no group differences: P = .91), follow-up measurements  
 109 showed a significant mean weight-loss compared to baseline of 3.61 kg (± 3.06, T<sub>(29)</sub> = 6.47, P < .001, d  
 110 = 1.18) in the DG, reflecting on average a 4% loss of baseline bodyweight and BMI respectively (T<sub>(29)</sub> =  
 111 6.66, P < .001, d = 1.22). Twenty-one dieters (70%) lost more than 2kg (range: 2.5 – 9.6 kg), only one  
 112 dieter gained more than 0.4kg (3.1 kg). In the WG, mean weight change was 0.07 kg (± 1.5 kg). Sixteen  
 113 participants of the WG were able to maintain their weight ± 2kg. Two gained weight (2.3 and 2.7 kg),  
 114 two lost weight of 2.3 kg and 4 kg respectively. Accordingly, percentage BMI change differed  
 115 significantly between groups (BMI<sub>%change</sub>: both T(48) = 5.45, P < .001, d = 1.39; Figure 2, Supplementary  
 116 Figure 1).

117

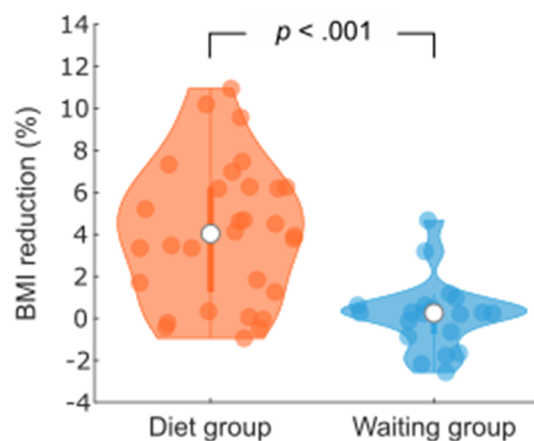

118

119 **Figure 2. Percentage BMI change after three months in the diet and the waiting group.** Violin plots  
 120 show individual data, median, interquartile range and 1.5x interquartile range.

121

122

123 **Baseline peripheral insulin sensitivity predicts dietary success**

124 Fasted serum c-peptide and plasma glucose levels were used for the calculation of an effective  
 125 measure of peripheral insulin resistance (CPR-IR equation :  $20/(\text{fasting serum c-peptide} \times \text{fasting}$   
 126  $\text{plasma glucose})$ ; Ohkura et al., 2013). To test the predictive value of baseline insulin resistance in the  
 127 periphery for dietary success after three months, we correlated individual CPR-IR scores assessed on  
 128 the placebo session from T0 with BMI<sub>%change</sub> in dieters and found a significant correlation ( $r = .38$ ;  $P =$   
 129  $.04$ ,  $n = 30$ , Pearson's correlation). That is, higher insulin sensitivity at baseline predicted more  
 130 subsequent weight loss in dieters (Figure 3a). There was no such correlation found in the WG and no  
 131 correlation was observed between BMI<sub>%change</sub> and baseline BMI (all  $P > .16$ ).

132

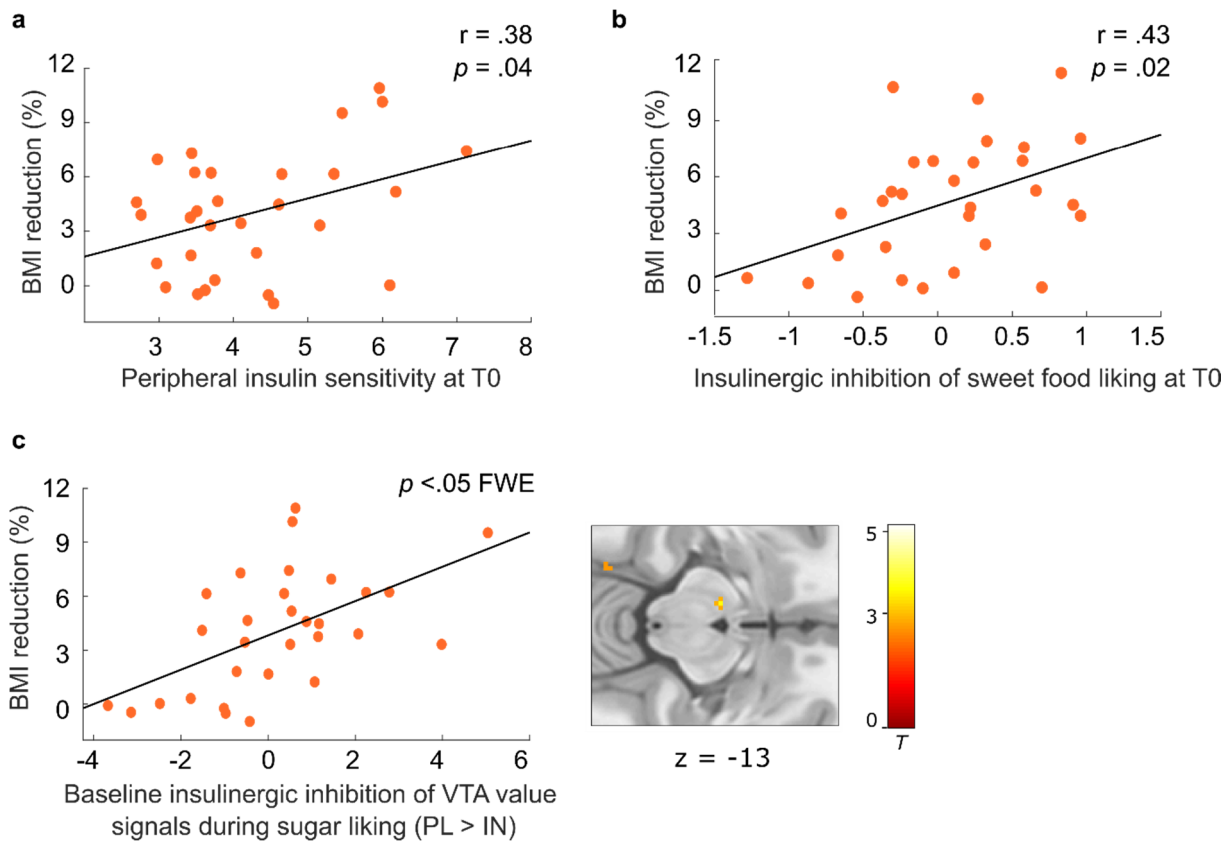

133

134

135 **Figure 3. Predictors of subsequent weight loss in dieters.** (a) Higher peripheral insulin sensitivity  
 136 measured via CPR-IR scores at baseline (T0) was related to higher percentage BMI reduction in dieters  
 137 at follow-up (T1). (b) Behavioral intranasal insulin effects predict weight loss in dieters. Reduced high  
 138 sugar food liking compared to low sugar food liking (HS>LS) under insulin relative to placebo (PL>IN)  
 139 was correlated with percentage BMI reduction in dieters. (c) Correlation between insulin effects in the  
 140 VTA at baseline and subsequent weight loss in dieters. Individual BOLD signals were extracted from  
 141 the peak voxel in the VTA resulting from the contrast  $PL_{HS>LS} > IN_{HS>LS}$  within dieters,  $P < .05$  FWE  
 142 corrected for bilateral VTA mask

143

144

145 **Insulinergic inhibition of sweet food liking at baseline predicts dietary success**

146 At T0, after an overnight fast of at least 10 h (day 1:  $12.5 \pm 1.6$  h; day 2:  $12.2 \pm 1.6$  h, no group  
 147 differences), all participants underwent a 2-day fMRI scanning procedure, separated by at least 1 week

148 (9.0 ± 3.4 days) that was combined with 160 IU INI or placebo in a double-blind, randomized crossover  
149 design (Figure 1). Fasting time and hunger ratings did not differ between groups (all  $P > .32$ ;  
150 Supplementary Table 2).

151 In the scanner, participants were asked to rate the overall preference for high and low sugar food and  
152 non-food items with yes (~ 'I like this') or no (~ 'I do not like this') by button press, which was followed  
153 by a four point rating scale where they were asked to provide a detailed rating, indicating how much  
154 they liked or disliked each item. Stimuli were presented in pseudo-randomized order. Parametric  
155 values were derived from transferring the general and the four-point rating into a single scale ranging  
156 from 1 ('not at all') to 8 ('very much') (validation study of all 4 sets, Supplementary Table 1).

157 Placebo and insulin sessions did not differ across individuals with respect to pre-scan insulin, glucose,  
158 c-peptide, hunger ratings and time fasted (all  $P > .27$ ,  $n = 50$ , t-test), nor were there any group x session  
159 differences in these parameters (all  $P > .11$ ,  $n_{DG} = 30$ ,  $n_{WG} = 20$ , rmANOVA). Similarly, changes in pre-  
160 compared with post-hunger ratings, as well as levels of glucose, did not differ between the placebo  
161 and the insulin session across and between groups (all  $P > 0.20$ ; rmANOVA). As expected, plasma insulin  
162 levels across all participants decreased over time ( $F_{(1,48)} = 38.79$ ;  $P < .001$ ,  $\eta^2 = 0.45$ ); there was a lower  
163 decrease at the insulin day across participants ( $F_{(1,48)} = 4.08$ ;  $P = .049$ ,  $\eta^2 = .08$ ) but not within single  
164 groups or as group interaction ( $P > .83$ ; Supplementary Table 2).

165 As expected, in the T0 placebo session, food items were liked significantly more than non-food items  
166 on the categorical (yes/no) and parametric (cumulated ratings 1-8) level (all  $P < .001$ ). Preference  
167 values for high (HS) and low sugar (LS) food did not differ across or between groups (all  $P > .15$ ). C-  
168 peptide based insulin sensitivity was correlated with HS liking, in a way that higher insulin sensitivity  
169 was related to lower HS liking ( $r = -.36$ ;  $P = .010$ ;  $n = 50$ , Pearson's correlation, Supplementary Figure  
170 2). There was no relationship of CPR-IR scores with LS liking ( $P > .19$ ).

171 We then investigated the effects of INI on preference values at T0. Analyses across and between groups  
172 yielded no significant differences between the placebo and the insulin session, neither for food > non-  
173 food nor for HS > LS food items (all  $P > .14$ , rmANOVA). There was no interaction between insulin  
174 effects and insulin sensitivity as assessed by CPR-IR. To investigate the predictive value of individual  
175 differences in insulin-effects on future weight changes we added BMI<sub>%change</sub> as a covariate into the  
176 analyses (rmANCOVA). While there was no interaction with insulin effects on general food versus non-  
177 food values, analysis on sugar-specific values (HS>LS) demonstrated a significant two-way-interaction  
178 session x BMI<sub>%change</sub> ( $F_{(1,48)} = 6.24$ ;  $P = .016$ ,  $\eta^2 = 0.12$ , rmANCOVA). A reduction of HS liking (versus LS)  
179 under insulin at baseline was hereby correlated with a higher weight loss after three months across  
180 participants ( $r = .34$ ;  $P = .016$ ;  $n = 50$ , Pearson's correlation). Further exploration revealed that this  
181 effect was only significant for the DG ( $r = .43$ ;  $P = .017$ ; Figure 3b) but not the WG ( $r = .03$ ;  $P > .90$ ).  
182 Moreover, when limiting the analysis of insulin effects to participants with a minimum BMI reduction  
183 of 1% ( $n = 25$ ), insulin decreased sugar preference (i.e., percentage of sweet foods in preferred foods)  
184 at baseline significantly ( $T_{(24)} = 2.10$ ;  $P = .046$ ,  $n = 25$ ,  $d = .42$ , t-test) and this effect was not correlated  
185 with BMI or CPR-IR (all  $P > .10$ , see discussion).

186

### 187 **Midbrain insulin effects during sugar liking predict weight-loss in dieters**

188 To examine the neural mechanisms of how insulin influenced the brain's mesocorticolimbic reward  
189 circuitry, we analyzed blood oxygenation level-dependent (BOLD) activity measured during the  
190 preference task using a two-level random effects model. As expected from our previous study  
191 (Tiedemann et al., 2017), the analysis of differences in BOLD responses to food compared to non-food  
192 items in the placebo session at T0 yielded highly significant activations across all participants in a  
193 network of reward-related brain regions including the bilateral insula, medial OFC, and Amygdala  
194 (Figure 4a). Also in line with our previous findings, regions that encode the subjective value of items,  
195 that is, regions that show a positive correlation between the amplitude of the BOLD response and

196 subjective preference values, comprised regions of the brain's valuation network including the vmPFC  
197 and NAc (Figure 4b). BOLD signals in these regions did not differ between groups. Furthermore,  
198 valuation of HS compared to LS food items evoked significantly stronger correlations between BOLD  
199 signal and preference values in the ACC/vmPFC (Figure 4c), the right caudate nucleus and thalamus (all  
200  $P < .05$  FWE corrected) and as trend in the right NAc (9, 10, -7; FWE = .09, Figure 4c).

201

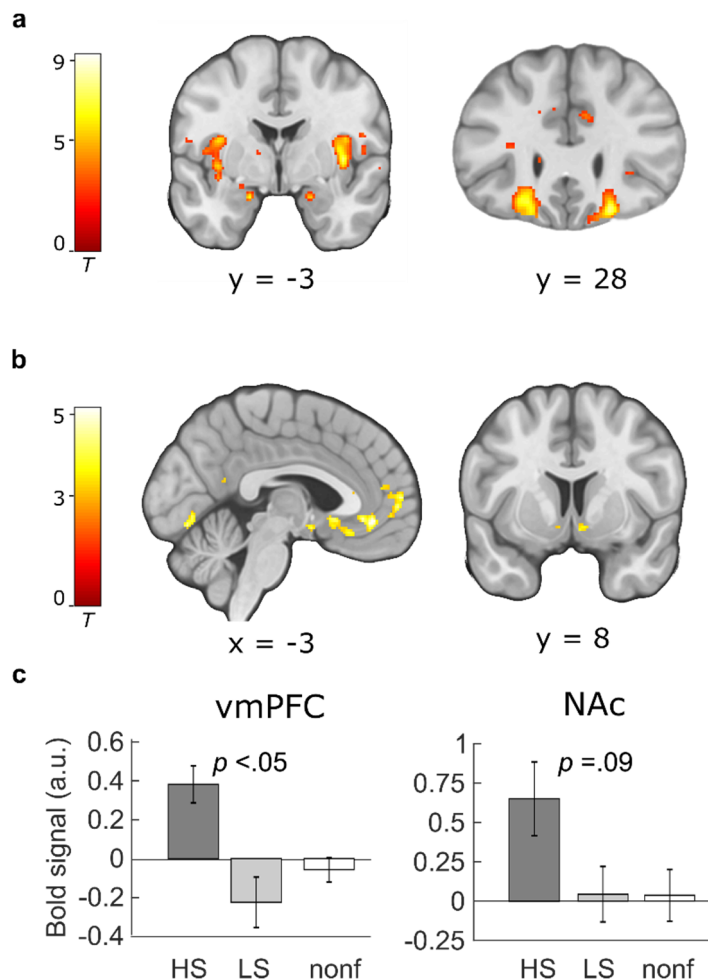

202

203

204 **Figure 4. Paradigm-induced activation patterns during baseline placebo.** a) Categorical effect of food  
205 stimulus presentation. Greater activity in the insula, amygdala and orbitofrontal cortex was observed  
206 in the food compared to the non-food condition across both groups. b) Neural representation of  
207 preference values (parametric analysis). Regions in which the correlation with preference values was  
208 significant across participants included the ventromedial prefrontal cortex (vmPFC) and the bilateral  
209 nucleus accumbens (NAc). (c) Sugar-specific BOLD signals in the vmPFC and right NAc. Bar plots show  
210 means and s.e.m. of contrast estimates extracted from peak voxels from the comparison HS > LS. All  
211 peaks and displayed P-values are  $P < 0.05$  FWE corrected. Activations are overlaid on a custom  
212 template (display threshold  $P < 0.005$  uncorrected).

213

214 We then investigated the effects of INI on these value signals. Here, in line with behavioral findings,  
215 analyses across and between groups yielded no significant changes of neural value signals for both  
216 general food items and HS versus LS items. There was also no relation between CPR-IR and neural  
217 insulin effects across individuals or within the DG. Following up on the behavioral findings, we next  
218 analyzed whether individual insulin effects on neural signals during HS compared to LS food valuation

219 predicted subsequent weight loss in the diet group. Simple regression analysis including BMI<sub>%change</sub> as  
220 a covariate yielded insulin induced signal changes in the left VTA to predict subsequent weight loss  
221 across all participants as well as within subjects from the diet group alone (-8, -13, -13,  $P < .05$  FWE  
222 corrected; Figure 3c). This indicates that participants in whom INI reduced the HS-specific valuation  
223 signal in the midbrain at T0 are more likely to benefit from caloric restriction by weight loss as assessed  
224 at T1.

225

## 226 **Baseline central and peripheral insulin sensitivity make independent contributions to the prediction** 227 **of dietary success**

228 To assess the incremental predictive value of baseline peripheral and central insulin sensitivity for  
229 weight changes after three months of intervention, we then performed a multiple regression analysis  
230 using CPR-IR scores and the extracted BOLD signal from the contrast  $PL_{HS>LS} > IN_{HS>LS}$  in the VTA to  
231 predict BMI<sub>%change</sub>. Within participants from the DG, this model turned out to be highly significant ( $F_{(2,27)}$   
232 = 10.39; adjusted  $R^2 = .39$ ;  $P < .001$ ), with both predictor variables explaining substantial variability  
233 (VTA-Bold:  $\beta = .54$ ;  $T = 3.74$ ;  $P < .001$ ; CPR-IR:  $\beta = .36$ ;  $T = 2.49$ ;  $P = .019$ ). Both effects remain significant  
234 when including baseline BMI as a control variable in the analysis ( $F_{(3,26)} = 6.78$ ;  $P = .002$ , Supplementary  
235 Table 4). This indicates, that peripheral and central insulin sensitivity at baseline have an independent  
236 positive impact on subsequent weight loss in overweight older dieters.

237

## 238 **Improvement of peripheral insulin sensitivity is related to increased insulin effects on NAc high sugar** 239 **value signals after weight loss**

240 We finally investigated metabolic and neurobehavioral changes due to successful weight loss. Within  
241 participants from the DG, CPR-IR scores were significantly improved at follow-up ( $T_{(29)} = 2.66$ ;  $P = .013$ ,  
242  $d = .49$ ) and as a trend in comparison to participants from the WG ( $T_{(48)} = 1.78$ ;  $P = .082$ ). Moreover,  
243 the improvement in CPR-IR scores was directly correlated with successful weight change within dieters  
244 ( $r = .50$ ;  $P = .005$ ; Pearson's correlation) and across all participants ( $r = .50$ ;  $P < .001$ ; Figure 5).

245

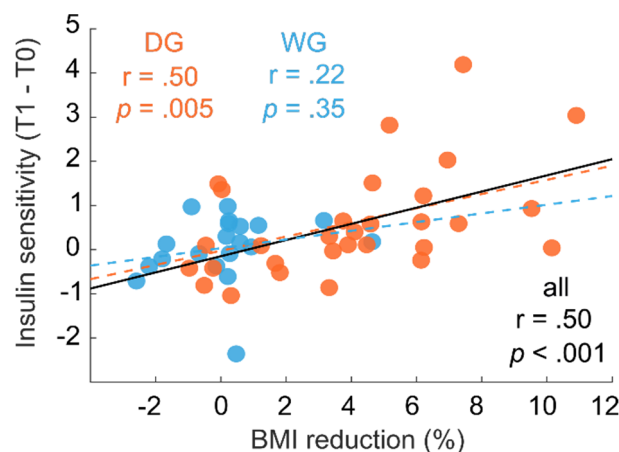

246

247 **Figure 5. Weight loss is related to improvements in peripheral insulin sensitivity.** Within dieters and  
248 across participants a higher percentage of BMI changes was correlated with an increase of insulin  
249 sensitivity as measured via the CPR-IR scores.

250

251 We next tested whether successful weight loss also improved central insulin sensitivity as assessed  
252 with our pharmacological fMRI design (for characteristics of the T1 fMRI sessions see Supplementary



253 Tables 2 and 3). In behavior, participants from the DG showed a significantly reduced sweet food  
254 preference (i.e., percentage of sweet foods in preferred foods) under insulin compared to placebo at  
255 follow-up ( $T_{(29)} = 2.59$ ;  $P = .015$ ,  $d = .47$ ) that tended to be stronger compared to the WG ( $T_{(49)} = 1.80$ ;  
256  $P = .08$ ) and to baseline ( $t(29) = 1.67$ ;  $P = .11$ ) (Figure 6a).

257 On the neural level, behavioral insulin effects in the DG at follow-up were reflected by a stronger  
258 reduction of sugar-specific value signals in the NAc under insulin in the DG compared to the WG (peak  
259 right: 10, 8, -7,  $P = .028$  FWE corrected and peak left: -10, 12, -8,  $P = .043$  FWE corrected, t-test). The  
260 effect in the right NAc was also significantly stronger when directly comparing follow-up to baseline  
261 valuation responses between groups (peak: 10, 8, -6,  $P = .019$  FWE corrected; two-sample t-test).  
262 Exploration of extracted BOLD signals (Figure 6b), indicate that this effect was at least partly driven by  
263 an opposite effect in the WG, i.e., sweet food signals in the NAc relatively increased under insulin at  
264 T1.

265

266

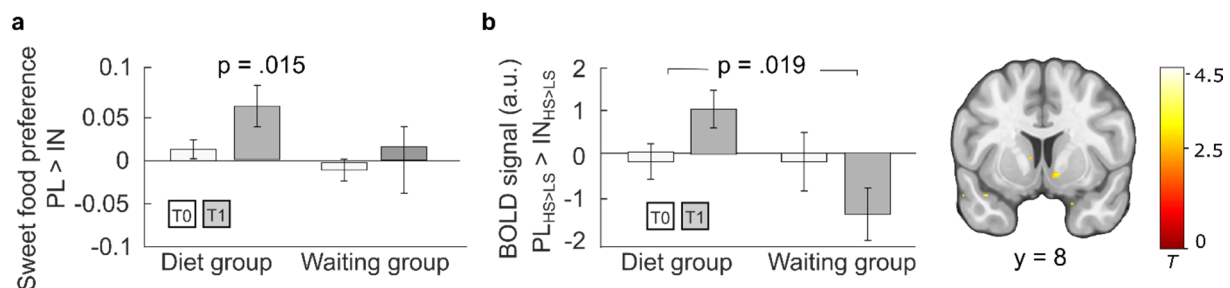

267

268

269 **Figure 6. Central insulin effects on behavior and brain activity before and after three months.** (a)  
270 Behavioral insulin effects on sweet food preference. While there was no insulin effect observed at  
271 baseline T0 in both groups, the percentage of preferred sweet food items decreased significantly under  
272 insulin compared to placebo at follow-up in dieters. (b) General linear modelling of sweet versus non-  
273 sweet value signals under insulin compared to placebo revealed a significantly stronger signal decrease  
274 in the diet group compared to the waiting group at follow-up (T1) compared to baseline (T0) in the  
275 right NAc. Bar plots show group means and s.e.m. of mean contrast estimates extracted from  
276 significant peak voxel.  $P < 0.05$  FWE corrected for bilateral NAc mask. Activations are overlaid on a  
277 custom template (display threshold  $P < 0.005$  uncorrected).

278

279 We therefore more directly focused on the DG and explored whether insulin-mediated neural signal  
280 changes after weight-loss were related to changes in peripheral insulin sensitivity following dietary  
281 intervention. To this end, changes in CPR-IR scores (post > pre) were entered as a covariate in a simple  
282 regression of BOLD signals from the contrast  $HS > LS_{PL > IN_{post}} > HS > LS_{PL > IN_{pre}}$  within participants from the  
283 DG. Results revealed positive correlations between improvement of insulin sensitivity measured in the  
284 blood and increased insulin effects in the NAc (peak left: -10, 10, -7,  $P = .005$  FWE corrected; peak right:  
285 10, 10, -8;  $P = .127$  FWE corrected; Figure 7). No significant brain correlates for this analysis were found  
286 in the WG.

287

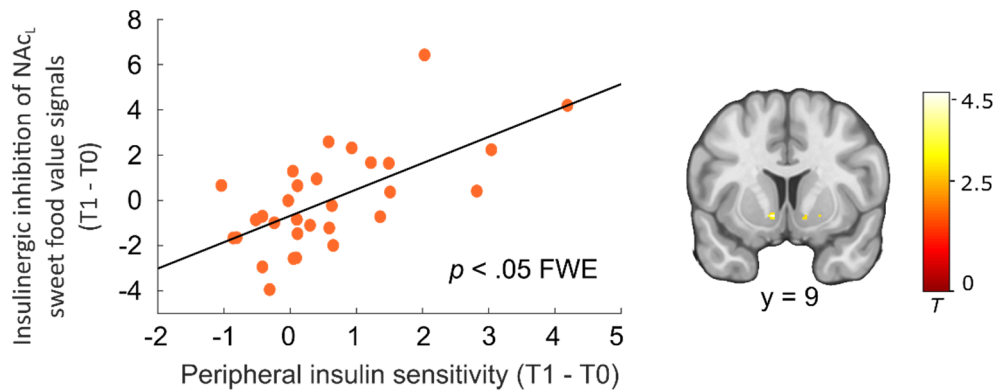

288

289 **Figure 7. Interaction between peripheral and central insulin changes in dieters.** Improved (T1 > T0)  
290 insulineric inhibition of sweet food value signals in the left Nucleus accumbens correlated with  
291 improved peripheral insulin sensitivity. Individual BOLD signals were extracted from the peak voxel in  
292 the right NAc resulting from simple regression analysis including the contrast  $HS > LS_{PL > IN\_post} >$   
293  $HS > LS_{PL > IN\_pre}$  and CPR-IR changes (post > pre) as covariate of interest.  $P < .05$  FWE corrected for bilateral  
294 NAc mask. Activations are overlaid on a custom template (display threshold  $P < 0.005$  uncorrected).

295

## 296 Discussion

297 Our findings demonstrate an independent predictive value of peripheral and central insulin sensitivity  
298 for dietary success in overweight elderlies and an improvement of both after losing weight. In non-  
299 diabetic, overweight and obese older participants who underwent a three-month caloric restriction,  
300 significant weight loss could be predicted by baseline measures of c-peptide based insulin sensitivity  
301 as well as acute insulineric inhibition of VTA responses to high sugar food items. Both markers of  
302 insulin function made an independent contribution to weight loss prediction emphasizing the necessity  
303 to take both aspects into account when assessing predictors and consequences of overweight in the  
304 elderly. At follow-up, weight loss in dieters was associated with improved peripheral insulin sensitivity  
305 which was directly related to a stronger insulineric inhibition in the NAc during hedonic food  
306 valuation. These findings extend work in rodents (Mebel et al., 2012) and first studies in humans  
307 (Kullmann et al., 2020b) about the critical role of insulin sensitivity for future feeding regulation. It is  
308 also, to our knowledge, the first study that demonstrates positive effects of caloric restriction on  
309 central insulin function in humans using a longitudinal within-subject design. The observation of such  
310 an effect in older adults is particularly important given age-related metabolic and neural changes and  
311 the potential, detrimental consequences of hyperinsulinemia, overweight and obesity in later life  
312 (Janssen, 2021).

313 As was expected from overweight and obese individuals, both peripheral and central markers of insulin  
314 sensitivity were low at baseline and both selectively improved with weight loss after caloric restriction  
315 in dieters. At baseline, participants with higher hyperinsulinemia demonstrated a specifically enhanced  
316 sugar preference which fits animal and human data on the critical role of sugar-enriched diets on whole  
317 body insulin functioning (Macdonald, 2016). Baseline insulin markers in the blood, however, were not  
318 related to behavioral or neural INI responses to high sugar items. This may be driven by the general  
319 lack of central insulin effects across participants at baseline which fits with data in overweight younger  
320 adults (Tiedemann et al., 2017) and which might result from an attenuated insulin transport into the  
321 cerebrospinal fluid in individuals with reduced whole-body insulin sensitivity (Heni et al., 2014).  
322 However, there was also no such association in the subgroup of successful dieters in whom there was  
323 a significant response to INI already before the intervention. This indicates that, even though  
324 peripheral insulin might be a good proxy for central insulin functioning in younger lean adults  
325 (Tiedemann et al., 2017), pathophysiological changes due to overweight and aging might at least in  
326 part independently affect peripheral and central insulin effects. This is further underlined by the  
327 independent predictive value of both markers for weight changes after three months of caloric

328 restriction. The impact of these predictive values could not be explained by body mass, which  
329 demonstrates that insulin sensitivity, but not necessarily obesity, is predictive for future weight  
330 management. Indeed, there is evidence from animal and human research of an adiposity-independent  
331 effect of aging on insulin sensitivity (Ehrhardt et al., 2019; Petersen et al., 2003), that, for instance,  
332 may result from age-related changes in mitochondrial energy metabolism (Petersen et al., 2003) or  
333 increased systemic inflammation (Ehrhardt et al., 2019).

334 Inhibitory INI effects on VTA value signals to sweet food items were selectively predictive for  
335 subsequent success of caloric restriction. The VTA plays a central role in the insulinergic modulation of  
336 hedonic eating behavior (Labouèbe et al., 2013; Mebel et al., 2012; Tiedemann et al., 2017). Direct  
337 administration of insulin into the VTA reduces hedonic feeding and depresses somatodendritic DA in  
338 the VTA which has been attributed to the upregulation of the number or function of DA transporter in  
339 the VTA (Mebel et al., 2012). Connectivity analyses of fMRI-data further suggest that INI can suppress  
340 food-value signals in the mesolimbic pathway by negatively modulating projections from the VTA to  
341 the NAc (Tiedemann et al., 2017). Insulinergic effects at baseline and follow-up were specifically  
342 restricted to high sugar food stimuli. The palatability of sugar has been linked to DA release in the NAc  
343 in rodents (Hajnal et al., 2004) and there is evidence for neural adaptations in the NAc in response to  
344 excessive sugar intake (Klenowski et al., 2016). For instance, higher sugar preference in overweight  
345 individuals has been related to stronger white matter connectivity within the VTA-NAc pathway  
346 (Francke et al., 2019). Our data indicate that insulinergic functionality in this network may be critical  
347 for hedonic feeding regulation as the reduction of sugar intake is substantial for the success of a dietary  
348 intervention.

349 A reduced insulinergic functionality of this network in older overweight individuals may not only be  
350 the consequence of adiposity (Mattson and Arumugam, 2018) but may also result from age-related  
351 metabolic and neural changes. Aging is associated with a decrease of cortical insulin concentration,  
352 reduced insulin receptor binding ability and reduced insulin transport across the blood-brain barrier  
353 (Cholerton et al., 2011). Moreover, target systems of metabolic-hedonic networks relevant for insulin  
354 action undergo age-related changes (Mattson and Arumugam, 2018; Smith et al., 2020). The dopamine  
355 system, for example, is particularly vulnerable to aging which might lead to functional changes in  
356 subcortical reward circuits (Dreher et al., 2008; Karrer et al., 2017). There is a significant loss of  
357 dopaminergic neurons in the basal ganglia including the VTA (Siddiqi et al., 1999). Given that insulin  
358 acts via glutamatergic synaptic transmission onto VTA DA neurons (Labouèbe et al., 2013) this might  
359 have direct consequences on the insulinergic suppression of subsequent DA release in mesolimbic  
360 regions. The potential negative impact of adiposity and age on described dysfunctions are thereby  
361 probably not simply additive. For instance, chronic metabolic morbidities like obesity can further  
362 accelerate brain aging (Mattson and Arumugam, 2018). A chronic positive energy balance thereby  
363 adversely affect brain function (Beyer et al., 2017) and structure (Janowitz et al., 2015) and is related  
364 to many of the cellular and molecular hallmarks of brain aging such as oxidative damage and  
365 neuroinflammation (Mattson and Arumugam, 2018).

366 Intriguingly, while there was no association between blood parameters and central insulin action at  
367 baseline, weight-change related improvements in peripheral and central insulin sensitivity in our  
368 sample of older dieters were directly correlated at follow-up, indicating a common modulator.  
369 Moreover, changes in central insulin sensitivity were restricted to an increased inhibition of value  
370 signals in the NAc but not the VTA. Thus, one could speculate that weight change specifically  
371 normalized adiposity-related dysfunctions while variability due to aging itself were less affected.  
372 Improvement in insulin sensitivity and glucose homeostasis is a broadly observed metabolic effect of  
373 caloric restriction (CR) in rodents (Yu et al., 2019; Zhang et al., 2021) as well as young and older adults  
374 (Fontana and Klein, 2007; Johnson et al., 2016; Most and Redman, 2020; Most et al., 2017). The  
375 mechanisms behind these effects are not fully understood yet but have been related to significantly  
376 increased hepatic insulin clearance (Bosello et al., 1990), reduced levels of thioredoxin-interacting  
377 protein (TXNIP; Johnson et al., 2016) and generally decreased oxidative stress and inflammatory

378 processes (Fontana and Klein, 2007). Animal data about CR effects on brain functioning suggest that  
379 CR can induce adaptive cellular responses that can enhance neuroplasticity and stress resistance, e.g.,  
380 by the upregulation of neurotrophic factor signaling, suppression of oxidative stress and inflammation,  
381 stabilization of neuronal calcium homeostasis and stimulation of mitochondrial biogenesis (Mattson,  
382 2012; Mattson and Arumugam, 2018). In addition, recent work in rodents demonstrate improved  
383 insulin sensitivity following CR that was associated with enhanced brain monoamine concentrations  
384 such as increased DA levels in the striatum (Portero-Tresserra et al., 2020). Our data extend these  
385 beneficial neural effects of caloric restriction in animals to improved central insulin functioning in the  
386 human brain. This is particularly intriguing with regard to our pre-diabetic sample of elderlies, in whom  
387 weight-related brain dysfunction is not only a risk factor for metabolic disorders but also for cognitive  
388 decline and neurodegeneration (Ekblad et al., 2017; Janssen, 2021; Mattson and Arumugam, 2018).

389 We chose a relatively mild dietary intervention that reduced participants' individual caloric intake by  
390 10-15% with a minimal intake set to 1200 kcal per day. This was done to increase compliance and to  
391 provide elderlies with a feasible long-term strategy to lose and maintain weight. Accordingly, there  
392 was only a mild to moderate average weight loss of 4%. Even this mild weight change was related to  
393 significant improvement of insulin sensitivity in the periphery and in the brain which underline that  
394 adiposity-related dysfunctions in later life are able to normalize. This is especially promising given new  
395 evidence for hyperinsulinemia preceding insulin resistance (Janssen, 2021) which makes it a key target  
396 for early interventions. It is now critical to understand the long-term effects of such changes with a  
397 special focus on food intake assuming that long-term effects are probably particularly dependent on  
398 prefrontal mediated psychological strategies including self-control during eating decisions (Hare et al.,  
399 2009; Phelan et al., 2020). In conclusion, we provide data demonstrating that whole-body insulin  
400 sensitivity as well as central hedonic feeding regulation predict and normalize with dietary success in  
401 overweight elderlies. Our results of an independent contribution peripheral and central insulin  
402 sensitivity make for successful feeding regulation emphasize the necessity to control for both when  
403 treating individuals at risk for metabolic disorders.

404

405

## 406 **Materials and Methods**

### 407 Participants

408 Sixty-four overweight and obese participants (age > 55, BMI > 25 kg/m<sup>2</sup>) with an explicit wish to lose  
409 weight were recruited for this study. Thirty-eight participants were randomized to the dietary  
410 intervention group while 26 were randomly assigned to the waiting group. Randomization was based  
411 on a pre-defined randomization list (allocation scheme 60:40) and was applied consecutively. Out of  
412 these 38 participants from the diet group (DG), two did not come back for the follow-up measurement,  
413 three individuals showed elevated glucose levels (>128) before at least one scanning session indicating  
414 they were not fasted, two showed task behavior indicating incomplete task understanding (i.e., always  
415 pressed the same button), and one participant had to be excluded due to massive movement artefacts  
416 in the scanner. Out of the initial 26 members of the waiting group (WG), two did not show up for the  
417 follow-up measurement, three had substantially increased insulin levels, and from one participant no  
418 task behavior could be recorded in the T1 insulin session due to technical issues. This led to a final  
419 sample size of 50 complete data sets (55 – 78 years, M = 63.7, s.d. = 5.9, 30 female), 30 derived from  
420 the DG and 20 derived from the WG. Mean BMI was 32.4 kg/m<sup>2</sup> (25.9 – 43.6, s.d. = 4.3). Sample  
421 characteristics are summarized in Table 1.

422 Sample sizes were based on previous findings on successful caloric restriction in older adults (Witte et  
423 al., 2009). A drop-out rate of 25% was considered in our recruitment scheme. Sensitivity measures  
424 derived from G\*Power 3.1.9 for the final sample sizes indicate our design to be sensitive to detect  
425 small (N=50) to medium (N=30) effects in one-sample and paired-t-Tests and large effects in two-  
426 sample t-tests (N=30, N=20) given an  $\alpha$  of 0.05 and  $\beta$  of .80.

427 Participants were recruited via newspapers and online announcements. Exclusion criteria were current  
428 or previous psychiatric or neurological disorders, chronic and acute physical illness including diabetes,  
429 current psychopharmacological medication as well as MR-specific exclusion criteria. No participant  
430 followed any specific diet at the start of the experiment. To exclude systematic confounds during food  
431 evaluation, severe food allergies and adherence to a vegan diet constituted further exclusion criteria.  
432 All participants had normal or corrected-to-normal visual acuity. The study was approved by the local  
433 ethics committee of the Ethical Board, Hamburg, Germany. All participants gave informed consent and  
434 were financially compensated for their participation. Additional financial incentives were provided to  
435 participants from the DG for successful weight loss ( $\geq 4$ kg) and to participants from the WG for keeping  
436 their weight stable (weight changes  $\leq 2$ kg). The whole study was conducted at the Department of  
437 Systems Neuroscience, University Medical Centre Hamburg-Eppendorf. The study has been registered  
438 at DRKS (DRKS00028576).

439

### 440 Experimental protocol

441 **Baseline (T0).** After successful screening, participants attended two experimental sessions, separated  
442 by at least 1 week. On each day, participants arrived in the morning between 7:30 and 10:30 h after  
443 an overnight fast of at least 10 h. After anthropometric measurements, ratings of feelings of current  
444 hunger and collection of blood samples, participants received 160 IU of insulin (Insuman Rapid, 100  
445 IU/ml ) or vehicle (0.27% m-Kresol, 1.6% glycerol, 98.13% water) by intranasal application. Participants  
446 received eight puffs per nostril, each puff consisting of 0.1ml solution containing 10 IU human insulin  
447 or 0.1 ml placebo. The order of insulin and placebo was randomized and balanced, and the application  
448 was double blind. Before scanning, participants were familiarized with the task during a training  
449 session. Participants began the preference paradigm (in the fMRI scanner) 30 min after the nasal spray  
450 was applied; this delay was introduced to ensure that the insulin had time to take its full effect (Born  
451 et al., 2002). After completion of the scans, participants again rated their feeling of hunger and a  
452 second set of blood samples was collected (Figure 1).

453 **Intervention.** Directly following the second scanning session, participants were randomly assigned to  
454 either the diet group (DG) or the waiting group (WG) following a 60:40 randomization scheme.  
455 Participants of the DG received a 12-weeks professional diet program that consisted of a) individual  
456 nutrition counselling by experienced clinical dieticians, who were blinded to the underlying study  
457 hypothesis, , and b) a psychological group intervention (Supplementary Figure 3).

458

459 Within individual sessions and based on individual dietary records, dieters received an individually  
460 planned dietary regimen that reduced each subject's individual caloric intake by 10-15%. Minimal  
461 intake was set to 1200 kcal per day. The regimen was based on the 10 guidelines of the German  
462 Nutrition Society ([www.dge.de](http://www.dge.de)). Dieters were contacted via telephone after 2, 6 and 12 weeks to clarify  
463 potential questions regarding the dietary regimen. After two weeks, participants additionally attended  
464 a 90 min group session consisting of psychoeducation regarding obesity and T2D, a mindfulness-based  
465 eating awareness training and a training of self-monitoring and –control strategies (e.g. use of goal-  
466 related eating protocols). In a final counselling, the dietary regimen was reviewed and future eating  
467 behavior was discussed.

468 Participants from the WG were instructed to not change previous eating habits during the 3-months  
469 period. In week 6, they attended a 90 min group session which consisted of a psychoeducational unit  
470 about stress and stress management as well as a training of progressive muscle relaxation (Jacobson,  
471 1987). After finishing all experimental sessions, participants of the WG were offered gratis dietary  
472 counselling identical to the one offered to the DG.

473

474 **Follow-up (T1).** Three months after the last baseline measurement, participants from both groups  
475 repeated the double blind randomized cross-over design from T0, i.e. they attended another three  
476 study days (screening, fMRI + placebo, fMRI + insulin).

477

478 **Blood measures.** On each scanning day before insulin/placebo application, blood samples were  
479 collected, containing the following: 2.7 ml blood in a sodium fluoride for analysis of blood glucose, 7.5  
480 ml blood in a serum tube for analysis of insulin and c-peptide. After completion of MR-scans blood  
481 sample collection for insulin and glucose analysis was repeated. After ten minutes of centrifugation  
482 (2,800g and room temperature), the supernatants of the blood samples were stored at -80 °C until  
483 further processing. Concentrations of insulin and c-peptide were measured using an electro-  
484 chemiluminescence immunoassay (Roche, ECLIA). Blood glucose was quantified through photometry  
485 (Beckman Coulter). We used fasted c-peptide serum levels for the calculation of an effective measure  
486 of insulin resistance (CPR-IR; formula:  $20/(\text{fasting serum c-peptide} \times \text{fasting plasma glucose})$ ; (Ohkura  
487 et al., 2013). An c-peptide based index is thought to be a more reliable indicator of insulin secretion  
488 that is minimally affected by hepatic insulin clearance, has longer half-life and that is more sensitive to  
489 incident T2D (Jones and Hattersley, 2013; Leighton et al., 2017; Okura et al., 2018). Indeed, in a control  
490 analysis we observed a significantly higher within-subject variability (coefficient of variance, COV) in  
491 pre-scan insulin levels at T0 as well as T1 compared to c-peptide levels (T0:  $T_{(49)} = 4.79$ ;  $P < .001$ ; T1:  
492  $(T_{(49)} = 4.47$ ;  $P < .001)$ ).

493

494 **fMRI food-rating paradigm.** Four sets of stimuli were randomly presented on the four scanning days.  
495 Each one of the four parallel versions consisted of 70 food and 70 non-food color images selected from  
496 the internet. All pictures had a size of 400 x 400 pixels and were presented on a white background.  
497 Food pictures featured both sweet and savory items. Pictures were specifically selected to cover  
498 common high- and low-palatable foods. Non-food pictures, such as trinkets and accessories were  
499 chosen to evoke similar degrees of attractiveness. Validation of all four sets was conducted in an

500 independent sample (n = 16) and revealed that the four sessions did not differ significantly regarding  
501 the mean preference ratings of the stimuli (Supplementary Table 1).

502 On each scanning day, food and non-food stimuli were pseudo-randomly presented (not more than  
503 three pictures from one category in a row) during three runs; each run lasted ~ 12 min and runs were  
504 separated by a 1min relaxation break. Every run began with the instructions (“We will soon start with  
505 the question: Do you like the presented item or not?”) (Figure 1).

506

507 **MRI data acquisition.** All imaging data were acquired on a Siemens PRISMA 3T scanner (Erlangen,  
508 Germany) using a 32-channel head coil. Functional data were obtained using a multiband echo-planar  
509 imaging sequence. Each volume of the experimental data contained 60 slices (voxel size 1.5\_1.5\_1.5  
510 mm) and was oriented 30° steeper than the anterior to posterior commissure (AC–PC) line (repetition  
511 time (TR) = 2.26 s, echo time (TE) = 30 ms, flip angle = 80°, field of view (FoV) = 225 mm, multi-band  
512 mode, number of bands: 2). An additional structural image (magnetization prepared rapid acquisition  
513 gradient echo (MPRAGE)) was acquired for functional preprocessing and anatomical overlay (240  
514 slices, voxel size 1x1x1 mm).

515

516 **fMRI data analysis.** Structural and functional data were analyzed using SPM12 (Wellcome Department  
517 of Cognitive Neurology, London, UK) and custom scripts in MATLAB. All functional volumes were  
518 corrected for rigid body motion and susceptibility artefacts (realign and unwarp). The individual  
519 structural T1 image was coregistered to the mean functional image generated during realignment. The  
520 functional images were spatially normalized and smoothed with a 4-mm full-width at half maximum  
521 isotropic Gaussian kernel.

522 A two-level random effects approach utilizing the GLM as implemented in SPM12 was used for  
523 statistical analyses. At the single subject level, onsets of high sugar (HS), low sugar (LS) and non-food  
524 stimuli presentation were modelled as separate regressors convolving delta functions with a canonical  
525 hemodynamic response function. In addition, combined rating scores were entered as parametric  
526 modulators of HS, LS and non-food regressors separately. Onsets of HS and LS were defined based on  
527 median splits on sugar content (g/100 g) of the respective stimulus set. Importantly, sugar medians did  
528 not differ between sets for placebo/insulin sessions before and after the intervention (all  $P > 0.25$ ;  
529 mean sugar median = 12.8 g sugar / 100 g). Data from the placebo and the insulin sessions were defined  
530 as single models. In all analyses, we accounted for the expected distribution of errors in the within-  
531 subject (dependency) and the between-group factors (unequal variance).

532 For each subject, contrast images of interest were then entered into second-level group analyses, i.e.  
533 one sample and two-sample t-tests. We report results corrected for FWE due to multiple comparisons.  
534 We conducted this correction at the peak level within small volume of interest (ROI) for which we had  
535 an a priori hypothesis or at the whole-brain level. Based on findings in our previous work using the  
536 identical pharmacological fMRI setup in younger individuals (Tiedemann et al., 2017), we focused on  
537 the NAc and the VTA. We applied the identical functional ROIs (4 mm spheres) centered on the  
538 bilateralized peak voxels in the NAc ( $\pm 12, 10, -8$ ) and the VTA ( $\pm 4, -14, -12$ ) as in this previous work  
539 and as identified via meta-analyses conducted on the neurosynth.org platform.

540

## 541 **Acknowledgments**

542 We thank V. Ott and M. Hallschmid for advice on the INI application setup. We gratefully  
543 acknowledge funding from the German Research Foundation (DFG, TR-SFB134).

544

545 **Author contributions**

546 S.B., C.B. and L.T. designed the experiment. LT., J.B. and P.F. performed the experiments. S.B. and L.T.  
547 analyzed the data. S.B., C.B. and S.M.M. wrote the paper. All authors discussed the results and  
548 commented on the manuscript at all stages.

549

550 **Declaration of interests**

551 The authors declare no competing interests.

552

553 **Data availability**

554 All data for analyses and figures in this study will be provided at Dryad.

555



## 556 Reference

- 557 Baranowska-Bik, A., and Bik, W. (2017). Insulin and brain aging. *Prz Menopauzalny* 16, 44–46.
- 558 Beyer, F., Kharabian Masouleh, S., Huntenburg, J.M., Lampe, L., Luck, T., Riedel-Heller, S.G., Loeffler,  
559 M., Schroeter, M.L., Stumvoll, M., Villringer, A., et al. (2017). Higher body mass index is associated  
560 with reduced posterior default mode connectivity in older adults. *Hum Brain Mapp* 38, 3502–3515.
- 561 Born, J., Lange, T., Kern, W., McGregor, G.P., Bickel, U., and Fehm, H.L. (2002). Sniffing  
562 neuropeptides: a transnasal approach to the human brain. *Nature Neuroscience* 5, 514–516.
- 563 Bosello, O., Zamboni, M., Armellini, F., Zocca, I., Bergamo Andreis, I.A., Smacchia, C., Milani, M.P.,  
564 and Cominacini, L. (1990). Modifications of abdominal fat and hepatic insulin clearance during severe  
565 caloric restriction. *Ann Nutr Metab* 34, 359–365.
- 566 Cholerton, B., Baker, L.D., and Craft, S. (2011). Insulin resistance and pathological brain ageing.  
567 *Diabet Med* 28, 1463–1475.
- 568 Davis, J.F., Choi, D.L., and Benoit, S.C. (2010). Insulin, leptin and reward. *Trends in Endocrinology &*  
569 *Metabolism* 21, 68–74.
- 570 Dreher, J.-C., Meyer-Lindenberg, A., Kohn, P., and Berman, K.F. (2008). Age-related changes in  
571 midbrain dopaminergic regulation of the human reward system. *PNAS* 105, 15106–15111.
- 572 Ehrhardt, N., Cui, J., Dagdeviren, S., Saengnipanthkul, S., Goodridge, H.S., Kim, J.K., Lantier, L., Guo,  
573 X., Chen, Y.-D.I., Raffel, L.J., et al. (2019). Adiposity-Independent Effects of Aging on Insulin Sensitivity  
574 and Clearance in Mice and Humans. *Obesity (Silver Spring)* 27, 434–443.
- 575 Ekblad, L.L., Rinne, J.O., Puukka, P., Laine, H., Ahtiluoto, S., Sulkava, R., Viitanen, M., and Jula, A.  
576 (2017). Insulin Resistance Predicts Cognitive Decline: An 11-Year Follow-up of a Nationally  
577 Representative Adult Population Sample. *Diabetes Care*.
- 578 Fontana, L., and Klein, S. (2007). Aging, adiposity, and calorie restriction. *JAMA* 297, 986–994.
- 579 Francke, P., Tiedemann, L.J., Menz, M.M., Beck, J., Büchel, C., and Brassen, S. (2019). Mesolimbic  
580 white matter connectivity mediates the preference for sweet food. *Scientific Reports* 9, 4349.
- 581 Hajnal, A., Smith, G.P., and Norgren, R. (2004). Oral sucrose stimulation increases accumbens  
582 dopamine in the rat. *Am. J. Physiol. Regul. Integr. Comp. Physiol.* 286, R31-37.
- 583 Hare, T.A., Camerer, C.F., and Rangel, A. (2009). Self-Control in Decision-Making Involves Modulation  
584 of the vmPFC Valuation System. *Science* 324, 646–648.
- 585 Heni, M., Schöpfer, P., Peter, A., Sartorius, T., Fritsche, A., Synofzik, M., Häring, H.-U., Maetzler, W.,  
586 and Hennige, A.M. (2014). Evidence for altered transport of insulin across the blood-brain barrier in  
587 insulin-resistant humans. *Acta Diabetol* 51, 679–681.
- 588 Janowitz, D., Wittfeld, K., Terock, J., Freyberger, H.J., Hegenscheid, K., Völzke, H., Habes, M., Hosten,  
589 N., Friedrich, N., Nauck, M., et al. (2015). Association between waist circumference and gray matter  
590 volume in 2344 individuals from two adult community-based samples. *Neuroimage* 122, 149–157.
- 591 Janssen, J.A.M.J.L. (2021). Hyperinsulinemia and Its Pivotal Role in Aging, Obesity, Type 2 Diabetes,  
592 Cardiovascular Disease and Cancer. *International Journal of Molecular Sciences* 22, 7797.

- 593 Johnson, M.L., Distelmaier, K., Lanza, I.R., Irving, B.A., Robinson, M.M., Konopka, A.R., Shulman, G.I.,  
594 and Nair, K.S. (2016). Mechanism by Which Caloric Restriction Improves Insulin Sensitivity in  
595 Sedentary Obese Adults. *Diabetes* 65, 74–84.
- 596 Jones, A.G., and Hattersley, A.T. (2013). The clinical utility of C-peptide measurement in the care of  
597 patients with diabetes. *Diabet Med* 30, 803–817.
- 598 Kalyani, R.R., Golden, S.H., and Cefalu, W.T. (2017). Diabetes and Aging: Unique Considerations and  
599 Goals of Care. *Diabetes Care* 40, 440–443.
- 600 Karrer, T.M., Josef, A.K., Mata, R., Morris, E.D., and Samanez-Larkin, G.R. (2017). Reduced dopamine  
601 receptors and transporters but not synthesis capacity in normal aging adults: a meta-analysis.  
602 *Neurobiol Aging* 57, 36–46.
- 603 Klenowski, P.M., Shariff, M.R., Belmer, A., Fogarty, M.J., Mu, E.W.H., Bellingham, M.C., and Bartlett,  
604 S.E. (2016). Prolonged Consumption of Sucrose in a Binge-Like Manner, Alters the Morphology of  
605 Medium Spiny Neurons in the Nucleus Accumbens Shell. *Front Behav Neurosci* 10, 54.
- 606 Kullmann, S., Kleinridders, A., Small, D.M., Fritsche, A., Häring, H.-U., Preissl, H., and Heni, M. (2020a).  
607 Central nervous pathways of insulin action in the control of metabolism and food intake. *Lancet*  
608 *Diabetes Endocrinol* 8, 524–534.
- 609 Kullmann, S., Valenta, V., Wagner, R., Tschritter, O., Machann, J., Häring, H.-U., Preissl, H., Fritsche,  
610 A., and Heni, M. (2020b). Brain insulin sensitivity is linked to adiposity and body fat distribution. *Nat*  
611 *Commun* 11, 1841.
- 612 Labouèbe, G., Liu, S., Dias, C., Zou, H., Wong, J.C.Y., Karunakaran, S., Clee, S.M., Phillips, A.G., Boutrel,  
613 B., and Borgland, S.L. (2013). Insulin induces long-term depression of ventral tegmental area  
614 dopamine neurons via endocannabinoids. *Nature Neuroscience* 16, 300–308.
- 615 Leighton, E., Sainsbury, C.A., and Jones, G.C. (2017). A Practical Review of C-Peptide Testing in  
616 Diabetes. *Diabetes Ther* 8, 475–487.
- 617 Liu, S., Labouèbe, G., Karunakaran, S., Clee, S.M., and Borgland, S.L. (2013). Effect of insulin on  
618 excitatory synaptic transmission onto dopamine neurons of the ventral tegmental area in a mouse  
619 model of hyperinsulinemia. *Nutrition & Diabetes* 3, e97.
- 620 Macdonald, I.A. (2016). A review of recent evidence relating to sugars, insulin resistance and  
621 diabetes. *Eur J Nutr* 55, 17–23.
- 622 Mattson, M.P. (2012). Energy Intake and Exercise as Determinants of Brain Health and Vulnerability  
623 to Injury and Disease. *Cell Metabolism* 16, 706–722.
- 624 Mattson, M.P., and Arumugam, T.V. (2018). Hallmarks of Brain Aging: Adaptive and Pathological  
625 Modification by Metabolic States. *Cell Metabolism* 27, 1176–1199.
- 626 Mebel, D.M., Wong, J.C.Y., Dong, Y.J., and Borgland, S.L. (2012). Insulin in the ventral tegmental area  
627 reduces hedonic feeding and suppresses dopamine concentration via increased reuptake. *European*  
628 *Journal of Neuroscience* 36, 2336–2346.
- 629 Most, J., and Redman, L.M. (2020). Impact of calorie restriction on energy metabolism in humans.  
630 *Exp Gerontol* 133, 110875.

- 631 Most, J., Tosti, V., Redman, L.M., and Fontana, L. (2017). Calorie restriction in humans: An update.  
632 *Ageing Res Rev* 39, 36–45.
- 633 Murray, S., Tulloch, A., Gold, M.S., and Avena, N.M. (2014). Hormonal and neural mechanisms of  
634 food reward, eating behaviour and obesity. *Nature Reviews Endocrinology* 10, 540–552.
- 635 Ohkura, T., Shiochi, H., Fujioka, Y., Sumi, K., Yamamoto, N., Matsuzawa, K., Izawa, S., Kinoshita, H.,  
636 Ohkura, H., Kato, M., et al. (2013).  $20/(\text{fasting C-peptide} \times \text{fasting plasma glucose})$  is a simple and  
637 effective index of insulin resistance in patients with type 2 diabetes mellitus: a preliminary report.  
638 *Cardiovascular Diabetology* 12, 21.
- 639 Okura, T., Nakamura, R., Fujioka, Y., Kawamoto-Kitao, S., Ito, Y., Matsumoto, K., Shoji, K., Sumi, K.,  
640 Matsuzawa, K., Izawa, S., et al. (2018). CPR-IR is an insulin resistance index that is minimally affected  
641 by hepatic insulin clearance—A preliminary research. *PLOS ONE* 13, e0197663.
- 642 Palmer, A.K., and Kirkland, J.L. (2016). Aging and adipose tissue: potential interventions for diabetes  
643 and regenerative medicine. *Exp Gerontol* 86, 97–105.
- 644 Petersen, K.F., Befroy, D., Dufour, S., Dziura, J., Ariyan, C., Rothman, D.L., DiPietro, L., Cline, G.W., and  
645 Shulman, G.I. (2003). Mitochondrial Dysfunction in the Elderly: Possible Role in Insulin Resistance.  
646 *Science* 300, 1140–1142.
- 647 Phelan, S., Halfman, T., Pinto, A.M., and Foster, G.D. (2020). Behavioral and Psychological Strategies  
648 of Long-Term Weight Loss Maintainers in a Widely Available Weight Management Program. *Obesity*  
649 (Silver Spring) 28, 421–428.
- 650 Portero-Tresserra, M., Rojic-Becker, D., Vega-Carbajal, C., Guillazo-Blanch, G., Vale-Martínez, A., and  
651 Martí-Nicolovius, M. (2020). Caloric restriction modulates the monoaminergic system and metabolic  
652 hormones in aged rats. *Sci Rep* 10, 19299.
- 653 Ryan, A.S. (2000). Insulin resistance with aging: effects of diet and exercise. *Sports Med* 30, 327–346.
- 654 Siddiqi, Z., Kemper, T.L., and Killiany, R. (1999). Age-related neuronal loss from the substantia nigra-  
655 pars compacta and ventral tegmental area of the rhesus monkey. *J Neuropathol Exp Neurol* 58, 959–  
656 971.
- 657 Smith, S.M., Elliott, L.T., Alfaro-Almagro, F., McCarthy, P., Nichols, T.E., Douaud, G., and Miller, K.L.  
658 (2020). Brain aging comprises many modes of structural and functional change with distinct genetic  
659 and biophysical associations. *ELife* 9, e52677.
- 660 Tchkonja, T., Morbeck, D.E., Zglinicki, T.V., Deursen, J.V., Lustgarten, J., Scrabble, H., Khosla, S., Jensen,  
661 M.D., and Kirkland, J.L. (2010). Fat tissue, aging, and cellular senescence. *Aging Cell* 9, 667–684.
- 662 Tiedemann, L.J., Schmid, S.M., Hettel, J., Giesen, K., Francke, P., Büchel, C., and Brassen, S. (2017).  
663 Central insulin modulates food valuation via mesolimbic pathways. *Nature Communications* 8,  
664 16052.
- 665 Witte, A.V., Fobker, M., Gellner, R., Knecht, S., and Flöel, A. (2009). Caloric restriction improves  
666 memory in elderly humans. *Proc. Natl. Acad. Sci. U.S.A.* 106, 1255–1260.
- 667 Yu, D., Tomaszewicz, J.L., Yang, S.E., Miller, B.R., Wakai, M.H., Sherman, D.S., Cummings, N.E., Baar,  
668 E.L., Brinkman, J.A., Syed, F.A., et al. (2019). Calorie-Restriction-Induced Insulin Sensitivity Is  
669 Mediated by Adipose mTORC2 and Not Required for Lifespan Extension. *Cell Reports* 29, 236-248.e3.

670 Zhang, L., Huang, Y., Sun, J., Zhang, T., Liu, T., Ke, B., Shi, X., Li, H., Zhang, G., Ye, Z., et al. (2021).  
671 Protective effects of calorie restriction on insulin resistance and islet function in STZ-induced type 2  
672 diabetes rats. *Nutrition & Metabolism* *18*, 48.

673
